# Supplementary material for: Need for Inclusive Consideration of Transgender and Gender Diverse People in E-Health Services: A Systematic Review
Source: MDPI journal article supplement (doi:10.3390/jcm11041090), 2022-02-18
Supplement: s1 [file s1]

## Supplementary File S1: PRISMA 2020 flow diagram for systematic review

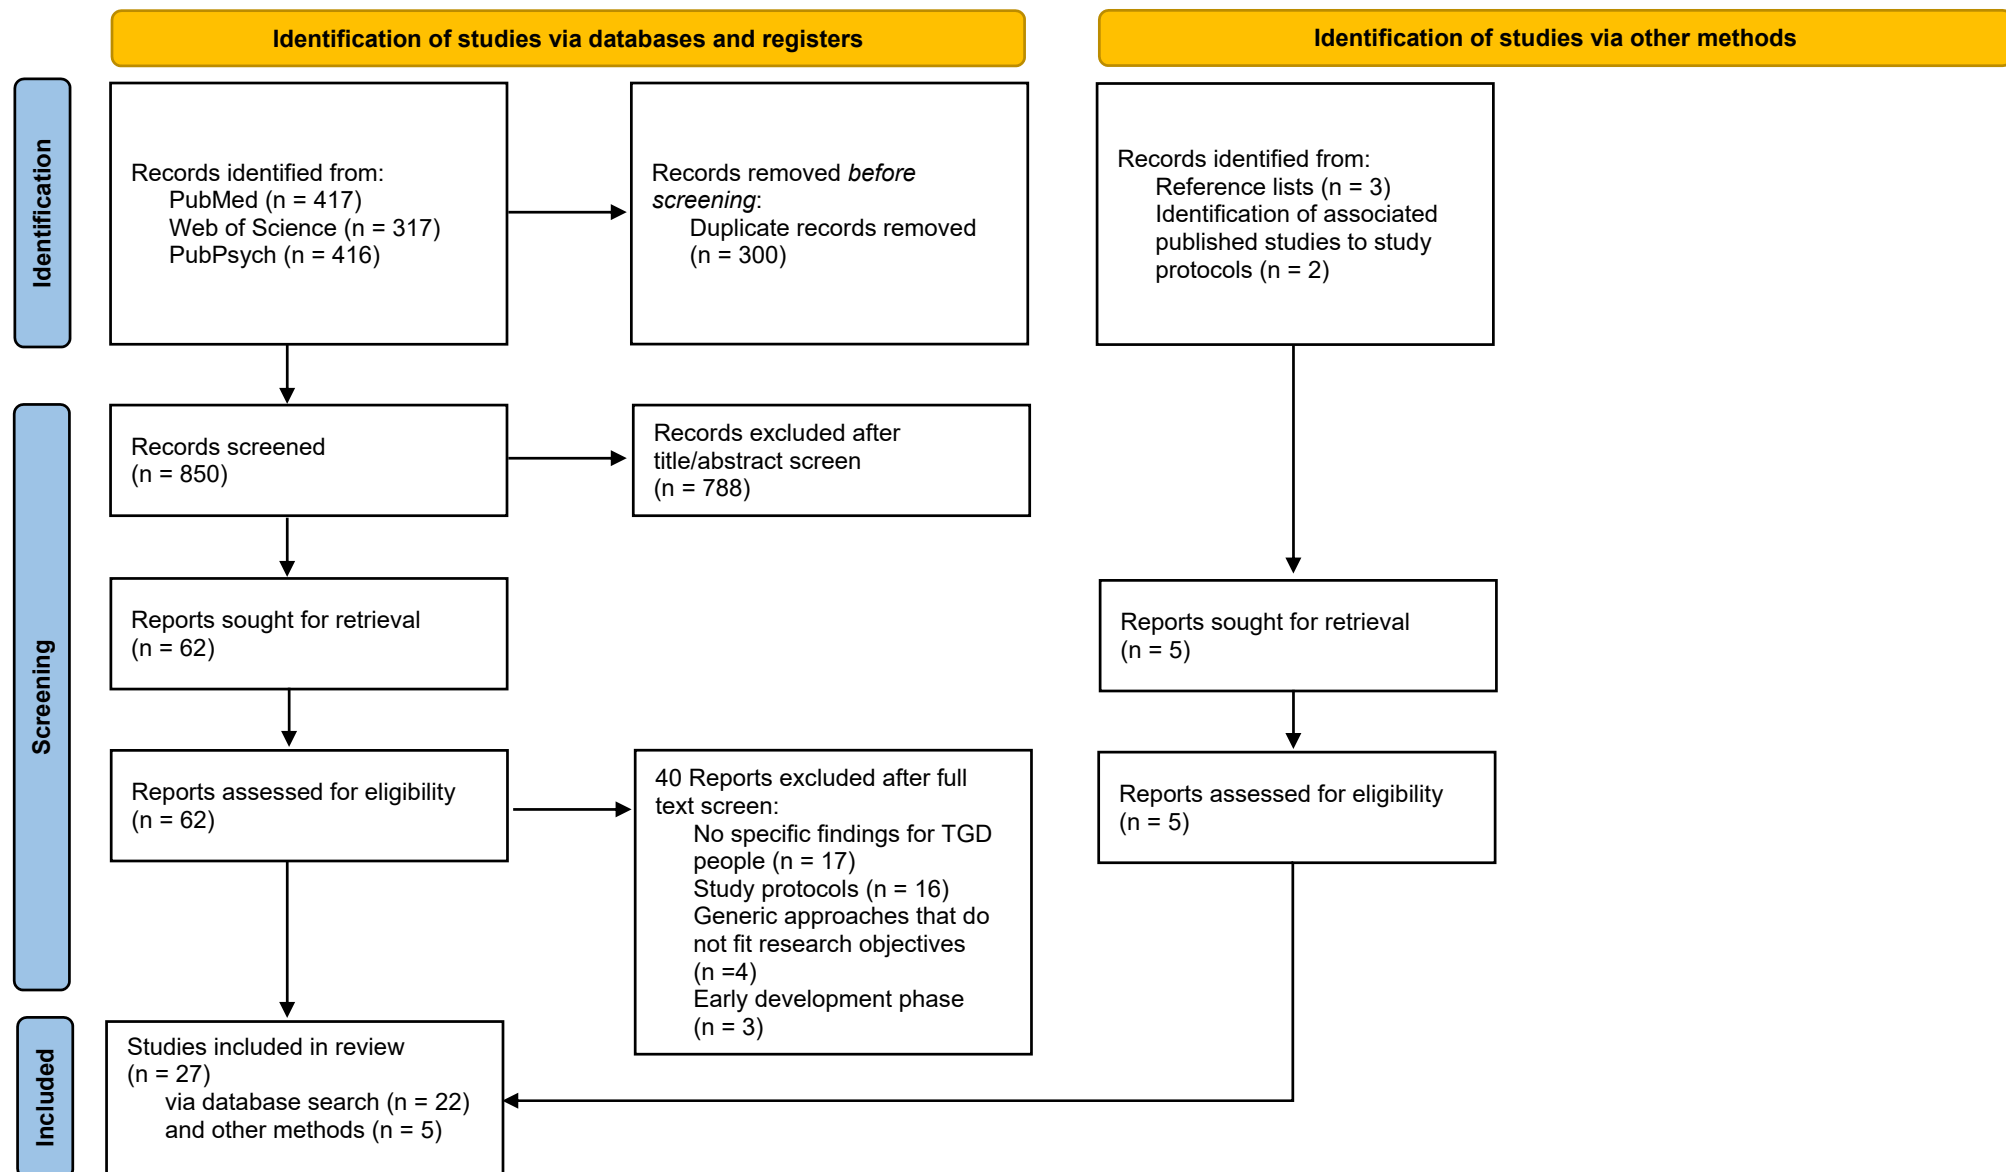

Figure S1. Flow diagram showing the selection process for the systematic review.

From: Page MJ, McKenzie JE, Bossuyt PM, Boutron I, Hoffmann TC, Mulrow CD, et al. The PRISMA 2020 statement: an updated guideline for reporting systematic reviews. BMJ 2021;372:n71. doi: 10.1136/bmj.n71. For more information, visit: <http://www.prisma-statement.org/>
