# Supplementary material for: Need for Inclusive Consideration of Transgender and Gender Diverse People in E-Health Services: A Systematic Review
Source: MDPI journal article supplement (doi:10.3390/jcm11041090), 2022-02-18
Supplement: s1 [file s1]

## **Supplementary File S3: Keywords and search strategies used for the systematic review.**

### **Concepts/Keywords**

#### **Sexual and gender minorities related terms**

LGBT, sexual orientation, gender identity, lesbian, women who have sex with women, gay, men who have sex with men, bisexual, intersex, queer, polyamor\*, non-monogam\*, pansexual, asexual, aromantic, sexual minority, gender minority, homosexual, same-sex

#### **Transgender related terms**

transgender, transsexualism, gender dysphoria, gender incongruence, gender identity disorder, trans\*, non-binary, gender diverse, genderqueer, gender fluidity, gender non-conforming, agender, genderless

#### **E-health services related terms**

eHealth, e-health, video consultation, videoconference, video service, video session, chat session, telemedicine, telehealth, teletherapy, online self-help, eTherapy, web-based therapy, internet-based intervention, digital health, e-mental health, online service, teleconsultation, eConsult, online consulting, online counseling, distance counseling, web-based, mobile health, computer-mediated communication, e-Sexual Health, mHealth, m-health, blended care, online coaching, video treatment, online treatment, blended treatment, social media health

#### **PubMed**

#1 (((((((((((((((((((LGBT) OR ("sexual orient\*\*")) OR ("gender ident\*\*")) OR (lesbian)) OR ("women who have sex with women")) OR (gay)) OR ("men who have sex with men")) OR (bisexual)) OR (intersex)) OR (queer)) OR (polyamor\*)) OR ("non-monogam\*\*")) OR ("nonmonogam\*\*")) OR (pansexual)) OR (asexual)) OR (aromantic)) OR ("sexual minorit\*\*")) OR ("gender minorit\*\*")) OR (homosexual)) OR ("same-sex"))  
#2 (((((((((((((((((((transgender) OR (transsex\*)) OR ("gender dysphori\*\*")) OR ("gender incongruen\*\*")) OR ("gender identity disorder")) OR (trans\*)) OR (nonbinary)) OR ("non-binary")) OR ("gender diverse")) OR (genderqueer)) OR ("gender fluid\*\*")) OR ("gender non-conform\*\*")) OR ("gender nonconform\*\*")) OR (agender)) OR (genderless))  
#3 (((((((((((((((((((((((((((((((((((((((("eHealth") OR ("e-health")) OR ("video consult\*\*")) OR (videoconference)) OR ("video service")) OR ("video session")) OR ("chat session")) OR (telemedicine)) OR (telehealth)) OR (teletherapy)) OR ("online self-help")) OR ("etherapy")) OR ("e-therapy")) OR ("web-based therapy")) OR ("internet-based intervention")) OR ("digital health")) OR ("e-mental health")) OR ("online service")) OR (teleconsult\*)) OR ("eConsult")) OR ("online consult\*\*")) OR ("online counsel\*\*")) OR ("distance counsel\*\*")) OR ("web-based")) OR ("mobile health")) OR ("computer-mediated communication")) OR ("e-Sexual Health")) OR ("eSexual Health")) OR ("mHealth")) OR ("m-health")) OR ("blended care")) OR ("online coaching")) OR ("video treatment")) OR ("online treatment")) OR ("blended treatment")) OR ("social media health"))  
#4 ("2000/01/01"[Date - Publication] : "3000"[Date - Publication])

#1 AND #2 AND #3 AND #4

**Timespan 2000/01/01 until 2021/06/30: 417 Results**

### **Web of Science**

TS=((LGBT OR "sexual orient\*" OR "gender ident\*" OR lesbian OR "women who have sex with women" OR gay OR "men who have sex with men" OR bisexual OR intersex OR queer OR polyamor\* OR "non-monogam\*" OR "nonmonogam\*" OR pansexual OR asexual OR aromantic OR "sexual minorit\*" OR "gender minorit\*" OR homosexual OR "same-sex") AND (transgender OR transsex\* OR "gender dysphori\*" OR "gender incongruen\*" OR "gender identity disorder" OR trans\* OR nonbinary OR "non-binary" OR "gender diverse" OR genderqueer OR "gender fluid\*" OR "gender non-conform\*" OR "gender nonconform\*" OR agender OR genderless) AND ("eHealth" OR "e-health" OR "video consult\*" OR videoconference OR "video service" OR "video session" OR "chat session" OR telemedicine OR telehealth OR teletherapy OR "online self-help" OR "etherapy" OR "e-therapy" OR "web-based therapy" OR "internet-based intervention" OR "digital health" OR "e-mental health" OR "online service" OR teleconsult\* OR "eConsult" OR "online consult\*" OR "online counsel\*" OR "distance counsel\*" OR "web-based" OR "mobile health" OR "computer-mediated communication" OR "e-Sexual Health" OR "eSexual Health" OR "mHealth" OR "m-health" OR "blended care" OR "online coaching" OR "video treatment" OR "online treatment" OR "blended treatment" OR "social media health"))

**Timespan 2000/01/01 until 2021/06/30: 317 Results**

### **PubPsych**

((LGBT OR "sexual orient\*" OR "gender ident\*" OR lesbian OR "women who have sex with women" OR gay OR "men who have sex with men" OR bisexual OR intersex OR queer OR polyamor\* OR "non-monogam\*" OR "nonmonogam\*" OR pansexual OR asexual OR aromantic OR "sexual minorit\*" OR "gender minorit\*" OR homosexual OR "same-sex") AND (transgender OR transsex\* OR "gender dysphori\*" OR "gender incongruen\*" OR "gender identity disorder" OR trans\* OR nonbinary OR "non-binary" OR "gender diverse" OR genderqueer OR "gender fluid\*" OR "gender non-conform\*" OR "gender nonconform\*" OR agender OR genderless) AND ("eHealth" OR "e-health" OR "video consult\*" OR videoconference OR "video service" OR "video session" OR "chat session" OR telemedicine OR telehealth OR teletherapy OR "online self-help" OR "etherapy" OR "e-therapy" OR "web-based therapy" OR "internet-based intervention" OR "digital health" OR "e-mental health" OR "online service" OR teleconsult\* OR "eConsult" OR "online consult\*" OR "online counsel\*" OR "distance counsel\*" OR "web-based" OR "mobile health" OR "computer-mediated communication" OR "e-Sexual Health" OR "eSexual Health" OR "mHealth" OR "m-health" OR "blended care" OR "online coaching" OR "video treatment" OR "online treatment" OR "blended treatment" OR "social media health"))  
PY>=2000 PY<=2021

**Timespan 2000/01/01 until 2021/06/30: 416 Results**
