# Supplementary material for: Need for Inclusive Consideration of Transgender and Gender Diverse People in E-Health Services: A Systematic Review
Source: MDPI journal article supplement (doi:10.3390/jcm11041090), 2022-02-18
Supplement: s1 [file s1]

Table S1. *Systematic review summary of included studies with TGD or combined LGBTQIA+ and mixed samples.*

| Intervention name                               | Outcomes                                   | Author(s)                 | Year | Location | Study design, Data collection                                                                                          | Description of sample, <i>n</i>                                                                                                                                                                                                                                                 | Digital platform         | Findings                                                                                                                                                                                                                                                                                                                                                                                                                                         |
|-------------------------------------------------|--------------------------------------------|---------------------------|------|----------|------------------------------------------------------------------------------------------------------------------------|---------------------------------------------------------------------------------------------------------------------------------------------------------------------------------------------------------------------------------------------------------------------------------|--------------------------|--------------------------------------------------------------------------------------------------------------------------------------------------------------------------------------------------------------------------------------------------------------------------------------------------------------------------------------------------------------------------------------------------------------------------------------------------|
| <b>Telehealth or telemedicine interventions</b> |                                            |                           |      |          |                                                                                                                        |                                                                                                                                                                                                                                                                                 |                          |                                                                                                                                                                                                                                                                                                                                                                                                                                                  |
| AFFIRM Online                                   | Depression, Coping, Stress Appraisal, Hope | Craig et al. <sup>a</sup> | 2021 | Canada   | <ul style="list-style-type: none"> <li>MM: non-randomized</li> <li>CBT online groups</li> </ul>                        | <ul style="list-style-type: none"> <li>96 participants (46 intervention group, 50 control group: waitlist control condition)</li> <li>Age: intervention: M = 21.17 (SD = 4.52), control: M = 23.42 (SD = 3.41)</li> <li>67.71% of total sample TGD</li> </ul>                   | Zoom (videoconferencing) | Post-test intervention group: <ul style="list-style-type: none"> <li>↓ depression</li> <li>more likely to appraise stress as challenge, appraise resources to deal with stress as enough</li> <li>↑ active coping, ↑ emotional/instrumental support, ↑ positive framing, ↑ planning, ↓ self-blame</li> <li>no statistically significant change in hope</li> <li>95.2% of completers agreed that they learned a lot from AFFIRM Online</li> </ul> |
| Project Moxie                                   | HIV and STI testing                        | Sharma et al.             | 2019 | USA      | <ul style="list-style-type: none"> <li>QNT: pilot RCT</li> <li>HIV testing with telehealth-based counseling</li> </ul> | <ul style="list-style-type: none"> <li>186 participants (75 trans men, 40.3%; 33 trans women, 17.7%; 78 non-binary individuals, 41.9%)</li> <li>2 age groups: 15-18 (n = 86, 46.2%), 19-24 (n = 100, 53.8%), average age: 19 years</li> <li>100% of total sample TGD</li> </ul> | VSee (videoconferencing) | Cross-sectional analysis of baseline characteristics: <ul style="list-style-type: none"> <li>6.1%-20.8% reported testing for HIV in the past year, 11.1%-33.3% reported testing for other STIs in the past year</li> <li>55.4% had heard about PrEP, and 0.5% was currently on PrEP</li> <li>trans women less likely to report testing for HIV and other STIs</li> </ul>                                                                         |

|                                     |                                                             |             |      |                                                                                                                     |                                                                                                                                                                                                                                                                                                                                                                   |                                                                                                               |                                                                                                                                                                                                                                                                                                                                                                                                                                                                                                                                                                                                                                                                     |                                                                                                                                                                                                                        |
|-------------------------------------|-------------------------------------------------------------|-------------|------|---------------------------------------------------------------------------------------------------------------------|-------------------------------------------------------------------------------------------------------------------------------------------------------------------------------------------------------------------------------------------------------------------------------------------------------------------------------------------------------------------|---------------------------------------------------------------------------------------------------------------|---------------------------------------------------------------------------------------------------------------------------------------------------------------------------------------------------------------------------------------------------------------------------------------------------------------------------------------------------------------------------------------------------------------------------------------------------------------------------------------------------------------------------------------------------------------------------------------------------------------------------------------------------------------------|------------------------------------------------------------------------------------------------------------------------------------------------------------------------------------------------------------------------|
|                                     |                                                             |             |      |                                                                                                                     |                                                                                                                                                                                                                                                                                                                                                                   |                                                                                                               |                                                                                                                                                                                                                                                                                                                                                                                                                                                                                                                                                                                                                                                                     | (compared with trans men) <ul style="list-style-type: none"><li>participants treated by trans-informed HCPs three times more likely to report getting tested for HIV and other STIs than those who disagreed</li></ul> |
| HIV and STI testing                 | Stephenson et al.                                           | 2020        | USA  | <ul style="list-style-type: none"><li>QNT: pilot RCT</li><li>HIV testing with telehealth-based counseling</li></ul> | <ul style="list-style-type: none"><li>202 participants (126 intervention HIV self-testing under supervision, 76 control HIV self-testing alone; 82 transmasculine, 36 transfeminine, 56 non-binary AFAB, 27 non-binary AMAB)</li><li>3 age groups: 15-17 (n = 66, 32.7%), 18-20 (n = 64, 32.1%), 21-24 (n = 71, 35.2%)</li><li>100% of total sample TGD</li></ul> | VSee (videoconferencing)                                                                                      | <ul style="list-style-type: none"><li>counselors described as friendly (98-100%), knowledgeable (100%), experienced (87-100%) and professional (97-100%)</li><li>participants willing to repeat intervention session (86-100%), recommend the intervention to others (68-100%), and recommend home-based HIV self-testing to others (95-100%)</li><li>↑ overall satisfaction levels with the intervention</li><li>↑ willingness to use PrEP in both groups</li><li>↑ testing for STIs in the past 3 months in the intervention (72.5%) than the control (42.9%) arm (p=0.001), but declined again by 6 months (intervention arm 19.2%, control arm 15.3%)</li></ul> |                                                                                                                                                                                                                        |
| Telemedicine consultations in Italy | Impact of Event, Depression, Health-related Quality of Life | Gava et al. | 2021 | Italy                                                                                                               | <ul style="list-style-type: none"><li>QNT: NIS</li><li>survey</li></ul>                                                                                                                                                                                                                                                                                           | <ul style="list-style-type: none"><li>108 participants (79 trans men, 73.1%, 29 trans women, 26.9%)</li></ul> | Videoconferencing (n.n.ref.)                                                                                                                                                                                                                                                                                                                                                                                                                                                                                                                                                                                                                                        | <ul style="list-style-type: none"><li>respondents confirmed the availability of telemedicine for endocrinological care</li></ul>                                                                                       |

|                                            |                                                                                               |                  |      |          |                                                                                                                                                                                                    |                                                                                                                                                                                                                                                   |                                                   |                                                                                                                                                                                                                                                                                                                                                                                                                                                                                                                                                                                                                                                                                                                               |
|--------------------------------------------|-----------------------------------------------------------------------------------------------|------------------|------|----------|----------------------------------------------------------------------------------------------------------------------------------------------------------------------------------------------------|---------------------------------------------------------------------------------------------------------------------------------------------------------------------------------------------------------------------------------------------------|---------------------------------------------------|-------------------------------------------------------------------------------------------------------------------------------------------------------------------------------------------------------------------------------------------------------------------------------------------------------------------------------------------------------------------------------------------------------------------------------------------------------------------------------------------------------------------------------------------------------------------------------------------------------------------------------------------------------------------------------------------------------------------------------|
|                                            |                                                                                               |                  |      |          |                                                                                                                                                                                                    | <ul style="list-style-type: none"> <li>• mean age: 34.3 (SD = 11.7, range = 18-61)</li> <li>• 100% of total sample TGD</li> </ul>                                                                                                                 |                                                   | <ul style="list-style-type: none"> <li>• (76.8%) and mental health support (64%)</li> <li>• 10 satisfaction scale: ↑ satisfaction 8.2 +/- 2.6 for the endocrinological visit and 8.0 +/- 2.4 for the psychological visit</li> <li>• availability of telemedicine consults associated with lower impact of the COVID-19 pandemic on mental health (better IES total scores)</li> <li>• 1/4 subjects presented a moderate to severe impact of the COVID-19 pandemic (IES score ≥ 26)</li> <li>• 12% presented moderate to severe depressive symptoms, 18.5% mild to moderate depression (trans women ↓ than trans men)</li> <li>• ↓ mental health-related quality of life than the general population of similar age</li> </ul> |
| Unnamed online HIV counselling and testing | feasibility, key factors for choosing service options, satisfaction among MSM and trans women | Phanuphak et al. | 2018 | Thailand | <ul style="list-style-type: none"> <li>• QNT: non-randomized</li> <li>• online, supervised, HIV self-testing</li> <li>• three distinct service delivery models (online, mixed, offline)</li> </ul> | <ul style="list-style-type: none"> <li>• 564 participants (465 MSM, 99 trans women)</li> <li>• mean age: 27.9 (SD = 7.2); MSM (mean age: 28.1, SD = 7.2), trans women (mean age: 26.8, SD = 7.2)</li> <li>• 17.55% of total sample TGD</li> </ul> | Video chatting platform of choice of participants | <p>Specific findings for trans people</p> <ul style="list-style-type: none"> <li>• Factors associated with selecting "online pre-test counselling": positive attitude towards HIV testing (however, prioritizing nucleic acid testing-based HIV testing decreased such chances)</li> </ul>                                                                                                                                                                                                                                                                                                                                                                                                                                    |

|                                                         |                            |      |          |                                                                                                                                                                                                |                                                                                                                                                                                                                                            |                                                   |                                                                                                                                                                                                                                                                                                                                                     |                                                                                                                                                                                                                                                                                                                                                                                                                                                                                                                                                                               |
|---------------------------------------------------------|----------------------------|------|----------|------------------------------------------------------------------------------------------------------------------------------------------------------------------------------------------------|--------------------------------------------------------------------------------------------------------------------------------------------------------------------------------------------------------------------------------------------|---------------------------------------------------|-----------------------------------------------------------------------------------------------------------------------------------------------------------------------------------------------------------------------------------------------------------------------------------------------------------------------------------------------------|-------------------------------------------------------------------------------------------------------------------------------------------------------------------------------------------------------------------------------------------------------------------------------------------------------------------------------------------------------------------------------------------------------------------------------------------------------------------------------------------------------------------------------------------------------------------------------|
|                                                         |                            |      |          |                                                                                                                                                                                                |                                                                                                                                                                                                                                            |                                                   |                                                                                                                                                                                                                                                                                                                                                     | <ul style="list-style-type: none"><li>• Factors associated with selecting “online HIV testing and online post-test counseling”: being a trans woman, spending 4 to 8+ hours on social media per day, preference towards online services and home-based HIV testing</li><li>• Factors associated with selecting “Offline” and “Mixed” groups: being a trans woman negatively influenced mixed group selection</li><li>• Primary apps for conducting video calls included LINE (87.5%), Facebook messenger (20.8%), ClickDesk (8.3%), Zoom (8.3%) and Facetime (8.3%)</li></ul> |
| linkages to HIV confirmatory testing and ART initiation | Phanuphak et al.           | 2020 | Thailand | <ul style="list-style-type: none"><li>• QNT: non-randomized</li><li>• online, supervised, HIV self-testing</li><li>• three distinct service delivery models (online, mixed, offline)</li></ul> | <ul style="list-style-type: none"><li>• 564 participants (200 offline group, 156 mixed group, 208 online group; 465 MSM, 99 trans women; 45 trans women in offline, 2 in mixed, and 52 in online group)</li><li>• see also above</li></ul> | Video chatting platform of choice of participants | <ul style="list-style-type: none"><li>• 75.0% of who tested reactive (=36 people) through online, supervised, HIV self-testing subsequently accessed HIV confirmatory testing</li><li>• 100% of them were confirmed to have HIV infection</li><li>• 52.8% of these who first tested reactive by HIV self-testing successfully started ART</li></ul> |                                                                                                                                                                                                                                                                                                                                                                                                                                                                                                                                                                               |
| Unnamed telehealth intervention                         | Magnus et al. <sup>b</sup> | 2018 | USA      | <ul style="list-style-type: none"><li>• MM: non-randomized pilot study</li></ul>                                                                                                               | <ul style="list-style-type: none"><li>• 25 participants (trans women of color)</li></ul>                                                                                                                                                   | Video chat (Digigone), e-mail, text, or phone     | <ul style="list-style-type: none"><li>• only texting, e-mailing, and phone contacts, no video chat contacts</li></ul>                                                                                                                                                                                                                               |                                                                                                                                                                                                                                                                                                                                                                                                                                                                                                                                                                               |

|                    |                                            |                               |      |     |                                                                                 |                                                                                                                                                                      |              |                                                                                                                                                                                                                                                                                                                                                                                                                                                                                                                                                                                                                                                                                                                                                                                                                                                                                   |  |
|--------------------|--------------------------------------------|-------------------------------|------|-----|---------------------------------------------------------------------------------|----------------------------------------------------------------------------------------------------------------------------------------------------------------------|--------------|-----------------------------------------------------------------------------------------------------------------------------------------------------------------------------------------------------------------------------------------------------------------------------------------------------------------------------------------------------------------------------------------------------------------------------------------------------------------------------------------------------------------------------------------------------------------------------------------------------------------------------------------------------------------------------------------------------------------------------------------------------------------------------------------------------------------------------------------------------------------------------------|--|
|                    | of care in past month                      |                               |      |     | <ul style="list-style-type: none"><li>3-month telehealth intervention</li></ul> | <ul style="list-style-type: none"><li>Age: 18-25 (n = 5, 20.0%), &gt;25 (n = 11, 44.0%), declined to state (n = 9, 36.0%)</li><li>100% of total sample TGD</li></ul> |              | <ul style="list-style-type: none"><li>intervention associated with ↑ odds of intention to seek transgender-specific care, having sought transgender-specific care in the last month, ↑ odds of seeking HIV-specific care</li></ul> <p>exit interviews after intervention:</p> <ul style="list-style-type: none"><li>better access to and more openness to receiving health care services</li><li>↑ knowledge where to seek services</li><li>participants were scared or nervous to ask about services or help, but telehealth intervention and access to the peer health consultant aided them to overcome this</li><li>participant choice of mode of communication depended on preference and familiarity</li><li>accessibility, knowledge base, and affability of the peer health consultants important for ability to improve access to care and overcome challenges</li></ul> |  |
| Mobile health apps |                                            |                               |      |     |                                                                                 |                                                                                                                                                                      |              |                                                                                                                                                                                                                                                                                                                                                                                                                                                                                                                                                                                                                                                                                                                                                                                                                                                                                   |  |
| MOTIVES            | HIV knowledge and frequency of HIV testing | MacCarthy et al. <sup>b</sup> | 2020 | USA | <ul style="list-style-type: none"><li>QNT: quasi-experimental</li></ul>         | <ul style="list-style-type: none"><li>218 participants (HIV-negative MSM and trans</li></ul>                                                                         | Mobile phone | <ul style="list-style-type: none"><li>Both treatment arms ↑ levels of HIV prevention knowledge</li></ul>                                                                                                                                                                                                                                                                                                                                                                                                                                                                                                                                                                                                                                                                                                                                                                          |  |

|                               |                  |      |     |                                                                                                                                                                                                                                                                                                             |                                                                                                                                                                                                                                                                                                                                                                  |              |                                                                                                                                                                                                                                                                                                                                                                                                                                                                                                             |
|-------------------------------|------------------|------|-----|-------------------------------------------------------------------------------------------------------------------------------------------------------------------------------------------------------------------------------------------------------------------------------------------------------------|------------------------------------------------------------------------------------------------------------------------------------------------------------------------------------------------------------------------------------------------------------------------------------------------------------------------------------------------------------------|--------------|-------------------------------------------------------------------------------------------------------------------------------------------------------------------------------------------------------------------------------------------------------------------------------------------------------------------------------------------------------------------------------------------------------------------------------------------------------------------------------------------------------------|
|                               |                  |      |     | <ul style="list-style-type: none"> <li>randomized pilot study</li> <li>• Mobile Technology and Incentives (MOTIVES) to increase HIV knowledge and testing frequency</li> <li>• weekly text messages (additionally for information plus group: win incentives by answering weekly quiz questions)</li> </ul> | <p>women, 2 intervention groups: 99 information only, of this 36.7% trans women, 119 information plus, of this 30.2% trans women),</p> <p>Comparisons (547 MSM and trans women)</p> <ul style="list-style-type: none"> <li>• Age: Information Only: M = 34.8, Information Plus: M = 35.2, Comparisons: M = 33.7</li> <li>• 12.4-36.7% of sample trans</li> </ul> |              | <p>at baseline, over time<br/>↑ HIV prevention knowledge in information plus group</p> <ul style="list-style-type: none"> <li>• Both MOTIVES intervention groups ↑ likely to test for HIV in any given 3-month interval (compared with comparison group)</li> </ul>                                                                                                                                                                                                                                         |
| acceptability and feasibility | MacCarthy et al. | 2021 | USA | <ul style="list-style-type: none"> <li>• QUAL: quasi-experimental randomized pilot study</li> <li>• Mobile Technology and Incentives (MOTIVES) to increase HIV knowledge and testing frequency</li> </ul>                                                                                                   | <ul style="list-style-type: none"> <li>• 41 study participants (n = 26 latinx sexual minority men and 15 latinx trans women) and study staff (n = 6)</li> <li>• mean age: 37.36 (n = 41)</li> <li>• 36.59% of total sample TGD</li> </ul>                                                                                                                        | Mobile phone | <p>Exit phone interviews:</p> <ul style="list-style-type: none"> <li>• Acceptability: high intervention coherence</li> <li>• participants appreciated the intervention and that it required minimal time</li> <li>• intervention feasibility: use of technology was mentioned as both a strength and sometimes a weakness</li> <li>• balance between programmatic and research goals: participant and study staff raised concerns about the time taken to complete research activities including</li> </ul> |

|                       |                                                                                                    |             |      |           |                                                                                                                                                    |                                                                                                                                                                                                                                                                                          |              |                                                                                                                                                                                                                                                                                                                                                                                                                                                                                                                                                                                                                                                                                                                                                                     |
|-----------------------|----------------------------------------------------------------------------------------------------|-------------|------|-----------|----------------------------------------------------------------------------------------------------------------------------------------------------|------------------------------------------------------------------------------------------------------------------------------------------------------------------------------------------------------------------------------------------------------------------------------------------|--------------|---------------------------------------------------------------------------------------------------------------------------------------------------------------------------------------------------------------------------------------------------------------------------------------------------------------------------------------------------------------------------------------------------------------------------------------------------------------------------------------------------------------------------------------------------------------------------------------------------------------------------------------------------------------------------------------------------------------------------------------------------------------------|
|                       |                                                                                                    |             |      |           |                                                                                                                                                    |                                                                                                                                                                                                                                                                                          |              | consenting, surveys etc.                                                                                                                                                                                                                                                                                                                                                                                                                                                                                                                                                                                                                                                                                                                                            |
| RUMAH SELA            | HIV/AIDS Knowledge, Sexual Behavior, Recency of HIV Testing, Self-Esteem, Mobile App Acceptability | Garg et al. | 2020 | Indonesia | <ul style="list-style-type: none"> <li>• QNT: non-randomized prospective intervention cohort study,</li> <li>• Android-based mobile app</li> </ul> | <ul style="list-style-type: none"> <li>• 168 participants: MSM (n=49), trans women (n=49), people who use drugs (n=70)</li> <li>• Age (years), mean (SD): MSM = 22.6 (3.3), trans women = 25.6 (3.0), people who use drugs = 23.7 (4.0)</li> <li>• 29.17% of total sample TGD</li> </ul> | Mobile phone | <ul style="list-style-type: none"> <li>• ↑ in comprehensive HIV-related knowledge from 22% (11/49) to 57% (28/49) among trans women (p&lt;.001)</li> <li>• reduction in sexual activities without condom use from 18% (9/49) to 12% (6/49) among trans women (p=.25)</li> <li>• uptake of HIV testing by 49% (24/49) for trans women</li> <li>• measures of self-esteem increased among trans women (mean 26.5 vs mean 27.8; p=.02)</li> <li>• 25% (4/15) of trans women made an appointment for an HIV test through the app</li> <li>• acceptability of the app: majority of the participants (36/39, 74% MSM; 41/49, 84% trans women; and 47/70, 67% people who use drugs) stated that they liked the game and health facility map features of the app</li> </ul> |
| Trans Women Connected | Usability testing, service utilization, goal setting, social support, PrEP knowledge               | Sun et al.  | 2020 | USA       | <ul style="list-style-type: none"> <li>• MM: developmental, usability non-randomized study</li> <li>• prototype mobile app</li> </ul>              | <ul style="list-style-type: none"> <li>• 16 participants (14 trans women, 2 non-binary)</li> <li>• mean age: 34.5 (SD = 9.28, range = 19-52)</li> </ul>                                                                                                                                  | Mobile phone | <p>Usability testing (phase 3)</p> <ul style="list-style-type: none"> <li>• ↑ likeability and usability (mean rating across all usability/likability questions was 5.9 out of 7)</li> </ul>                                                                                                                                                                                                                                                                                                                                                                                                                                                                                                                                                                         |

|                     |                                                  |                     |      |     |                                                                                                                                                          |                                                                                                                                                                                           |              |                                                                                                                                                                                                                                                                                                                                                                                                                                                                                                                                                                                            |
|---------------------|--------------------------------------------------|---------------------|------|-----|----------------------------------------------------------------------------------------------------------------------------------------------------------|-------------------------------------------------------------------------------------------------------------------------------------------------------------------------------------------|--------------|--------------------------------------------------------------------------------------------------------------------------------------------------------------------------------------------------------------------------------------------------------------------------------------------------------------------------------------------------------------------------------------------------------------------------------------------------------------------------------------------------------------------------------------------------------------------------------------------|
|                     |                                                  |                     |      |     |                                                                                                                                                          | <ul style="list-style-type: none"><li>100% of total sample TGD</li></ul>                                                                                                                  |              | <ul style="list-style-type: none"><li>↑ multiple social support measures</li><li>↑ self-efficacy in finding LGBTQ-friendly services</li><li>↑ intention to seek online social support</li><li>↑ PrEP knowledge</li><li>Positive qualitative feedback: participants felt the app was useful and attractive</li></ul>                                                                                                                                                                                                                                                                        |
| Unnamed eNavigation | efficacy, HIV care continuum outcomes            | Arayasirikul et al. | 2020 | USA | <ul style="list-style-type: none"><li>QNT: non-randomized non-comparative</li><li>text message-based, digital HIV care navigation intervention</li></ul> | <ul style="list-style-type: none"><li>120 participants (103 men, 17 trans women)</li><li>mean age: 27.75 years (SD 4.07), range: 18-34 years</li><li>14.17% of total sample TGD</li></ul> | Mobile phone | <ul style="list-style-type: none"><li>Baseline: 99/120 (82.5%) of the participants recently received primary HIV care; 92/120 reported taking ART (76.7%) and 65/120 having an undetectable viral load (54.2%)</li><li>↑ odds of viral suppression at 6 months compared with baseline</li><li>no statistically significant additive or multiplicative interactions on comparing outcome effects over time according to intervention completion</li><li>on testing for stratum-specific effects: viral suppression increased over time among those who completed the intervention</li></ul> |
| weCare              | process evaluation of mobile health intervention | Tanner et al.       | 2020 | USA | <ul style="list-style-type: none"><li>QUAL: non-randomized non-comparative</li></ul>                                                                     | <ul style="list-style-type: none"><li>32 participants: 18 intervention participants (13 cis men, 5 trans</li></ul>                                                                        | Mobile phone | Interviews: <ul style="list-style-type: none"><li>Approach uses existing social media platforms</li></ul>                                                                                                                                                                                                                                                                                                                                                                                                                                                                                  |



|  |  |  |  |  |                                                                                                                              |                                                                                                                                                                                                                                     |  |                                                                                                                                                                                                                                                                                                                                                                                                                                                                             |
|--|--|--|--|--|------------------------------------------------------------------------------------------------------------------------------|-------------------------------------------------------------------------------------------------------------------------------------------------------------------------------------------------------------------------------------|--|-----------------------------------------------------------------------------------------------------------------------------------------------------------------------------------------------------------------------------------------------------------------------------------------------------------------------------------------------------------------------------------------------------------------------------------------------------------------------------|
|  |  |  |  |  | <ul style="list-style-type: none"> <li>HIV care related mobile health intervention, bilingual (English + Spanish)</li> </ul> | <p>women), and 14 HIV clinic providers and staff</p> <ul style="list-style-type: none"> <li>Mean age (intervention participants): 25.2 (SD = 3.79; range = 20–36)</li> <li>27.78% of the intervention participants trans</li> </ul> |  | <ul style="list-style-type: none"> <li>HCPs therefore able to engage with participants in a more community-oriented way</li> <li>Bidirectional messaging allows client-centered, individualized treatment</li> <li>Type and frequency of intervention can be adaptively adjusted to the client's current situation</li> <li>Positive evaluation of approach, improvements should focus on implementation logistics, intervention content, intervention expansion</li> </ul> |
|--|--|--|--|--|------------------------------------------------------------------------------------------------------------------------------|-------------------------------------------------------------------------------------------------------------------------------------------------------------------------------------------------------------------------------------|--|-----------------------------------------------------------------------------------------------------------------------------------------------------------------------------------------------------------------------------------------------------------------------------------------------------------------------------------------------------------------------------------------------------------------------------------------------------------------------------|

| Game-based interventions |                                                         |                          |      |     |                                                                                                                           |                                                                                                                                                                                                                                                                                                                                   |                         |                                                                                                                                                                                                                                                                                                                                                                                                                |
|--------------------------|---------------------------------------------------------|--------------------------|------|-----|---------------------------------------------------------------------------------------------------------------------------|-----------------------------------------------------------------------------------------------------------------------------------------------------------------------------------------------------------------------------------------------------------------------------------------------------------------------------------|-------------------------|----------------------------------------------------------------------------------------------------------------------------------------------------------------------------------------------------------------------------------------------------------------------------------------------------------------------------------------------------------------------------------------------------------------|
| Singularities            | implementation success, game demand, game acceptability | Egan et al. <sup>a</sup> | 2021 | USA | <ul style="list-style-type: none"> <li>QNT: 2-arm nonblinded pilot RCT</li> <li>role-playing game intervention</li> </ul> | <ul style="list-style-type: none"> <li>240 participants (120 intervention with access to the game and a resource list, 120 control with access to the resource list only)</li> <li>sexual and gender minority youth, thereof 113 gender minority</li> <li>Age: intervention: M = 15.79, control: M = 15.74, All: 15.77</li> </ul> | Web-accessible computer | <ul style="list-style-type: none"> <li>Game demand: 55.8% of intervention participants self-reported downloading and 55.8% self-reported playing the game (lower than hypothesized thresholds).</li> <li>Of those that played, 68.2% reported playing an hour or greater, which exceeded hypothesis.</li> <li>Game-playing participants exceeded hypothesized benchmarks and reported high positive</li> </ul> |

|                      |               |                 |      |                |                                                                                                                                        |                                                                                                                                                                                                     |                         |                                                                                                                                                                                                                                                                                                                                                                                                                                                                                                        |
|----------------------|---------------|-----------------|------|----------------|----------------------------------------------------------------------------------------------------------------------------------------|-----------------------------------------------------------------------------------------------------------------------------------------------------------------------------------------------------|-------------------------|--------------------------------------------------------------------------------------------------------------------------------------------------------------------------------------------------------------------------------------------------------------------------------------------------------------------------------------------------------------------------------------------------------------------------------------------------------------------------------------------------------|
|                      |               |                 |      |                |                                                                                                                                        | <ul style="list-style-type: none"><li>47.08% of total sample TGD</li></ul>                                                                                                                          |                         | <ul style="list-style-type: none"><li>affect, low negative affect, low tension/annoyance, and high competence while playing the game.</li><li>Of those who played the game, 46.2% reported a desire to play it again, and 50.8% would recommend it to friends.</li><li>intervention group reported: ↓ cyberbullying victimization, ↓ binge alcohol use frequency, ↑ knowledge and greater use of online resources</li></ul>                                                                            |
| Rainbow SPARX/ SPARX | acceptability | Lucassen et al. | 2018 | United Kingdom | <ul style="list-style-type: none"><li>QUAL: non-randomized non-comparative computerized CBT self-help program: Rainbow SPARX</li></ul> | <ul style="list-style-type: none"><li>21 LGBT+ youth participants, 6 HCP</li><li>LGBT+ young people: aged 15-22 years, mean age 17.9 years</li><li>19.05% of the LGBT+ participants trans</li></ul> | Web-accessible computer | <ul style="list-style-type: none"><li>How and why LGBT+ young people use the internet to support their mental health: personal pathways (e.g., mindful videos on YouTube)</li><li>HCPs concerned about safety and security (e.g., cyberbullying)</li><li>Considering e-therapy like Rainbow SPARX as a useful tool: most HCPs would recommend the program when feeling down (only 8/21 LGBT+ young people recommend it for that reason)</li><li>Pressure for a game-like e-therapy format to</li></ul> |

|                     |                 |      |             |                                                                                                                              |                                                                                                                                                                                                                                                                                                                                   |                         |                                                                                                                                                                                                                                                                                                                                                                                                                                                                                                                                                                                                                                                                                                                                   |
|---------------------|-----------------|------|-------------|------------------------------------------------------------------------------------------------------------------------------|-----------------------------------------------------------------------------------------------------------------------------------------------------------------------------------------------------------------------------------------------------------------------------------------------------------------------------------|-------------------------|-----------------------------------------------------------------------------------------------------------------------------------------------------------------------------------------------------------------------------------------------------------------------------------------------------------------------------------------------------------------------------------------------------------------------------------------------------------------------------------------------------------------------------------------------------------------------------------------------------------------------------------------------------------------------------------------------------------------------------------|
| depressive symptoms | Lucassen et al. | 2020 | New Zealand | <ul style="list-style-type: none"> <li>• QNT: non-randomized</li> <li>• computerized CBT self-help program: SPARX</li> </ul> | <ul style="list-style-type: none"> <li>• Finishers (n=891): baseline to last module (4 or 7): transgender (n=14), male (n=247), female (n=630)</li> <li>• Age groups: 12-15 and 16-19; at registration: transgender (n=294), thereof 12-15 (n=131, 63.3%), 16-19 (n=76, 36.7%)</li> <li>• 1.57% of the finishers trans</li> </ul> | Web-accessible computer | <p>be as up-to-date as possible relative to commercial games</p> <ul style="list-style-type: none"> <li>• initial respectable recruitment of trans people, but much lost-to-follow-up</li> <li>• trans users (n = 185) at baseline depression assessment ↑ mental health needs (69.0%)</li> <li>• overall low completion rates at Modules 4 and 7 for all users (less than 10%)</li> <li>• trans users reported no improvements in depressive symptoms (but for cis male and female improvements)</li> <li>• 'look and feel' of SPARX for gender minority adolescents may in part explain the low completion rates (forced gender binary)</li> <li>• SPARX (not Rainbow SPARX) = not trans-specific, not LGBT-specific</li> </ul> |
|---------------------|-----------------|------|-------------|------------------------------------------------------------------------------------------------------------------------------|-----------------------------------------------------------------------------------------------------------------------------------------------------------------------------------------------------------------------------------------------------------------------------------------------------------------------------------|-------------------------|-----------------------------------------------------------------------------------------------------------------------------------------------------------------------------------------------------------------------------------------------------------------------------------------------------------------------------------------------------------------------------------------------------------------------------------------------------------------------------------------------------------------------------------------------------------------------------------------------------------------------------------------------------------------------------------------------------------------------------------|

#### Online programs or courses

|              |                                                                                                                                                                  |                  |      |     |                                                                                                                                                 |                                                                                                                                                                                                                                  |                                              |                                                                                                                                                                                                                                                                                                                                  |
|--------------|------------------------------------------------------------------------------------------------------------------------------------------------------------------|------------------|------|-----|-------------------------------------------------------------------------------------------------------------------------------------------------|----------------------------------------------------------------------------------------------------------------------------------------------------------------------------------------------------------------------------------|----------------------------------------------|----------------------------------------------------------------------------------------------------------------------------------------------------------------------------------------------------------------------------------------------------------------------------------------------------------------------------------|
| Queer Sex Ed | feasibility, acceptability, efficacy, sexual health: sexual orientation identity and self-acceptance, sexual health knowledge, relationship variables, safer sex | Mustanski et al. | 2015 | USA | <ul style="list-style-type: none"> <li>• MM: non-randomized non-comparative pilot study</li> <li>• online sexual health intervention</li> </ul> | <ul style="list-style-type: none"> <li>• 202 participants: 103 male, 84 female, 14 transgender (4 AMAB, 10 AFAB), 1 N/A</li> <li>• mean age: 17.91 years, age range: 16-20 years</li> <li>• 6.93% of total sample TGD</li> </ul> | Web-based software (web-accessible computer) | <ul style="list-style-type: none"> <li>• majority of health outcomes (15/17) significant (<math>p &lt; .05</math>)</li> <li>• small effect sizes for sexual orientation (e.g., internalized homophobia) and relationship variables (e.g., communication skills)</li> <li>• moderate effect sizes for safer sex (e.g.,</li> </ul> |
|--------------|------------------------------------------------------------------------------------------------------------------------------------------------------------------|------------------|------|-----|-------------------------------------------------------------------------------------------------------------------------------------------------|----------------------------------------------------------------------------------------------------------------------------------------------------------------------------------------------------------------------------------|----------------------------------------------|----------------------------------------------------------------------------------------------------------------------------------------------------------------------------------------------------------------------------------------------------------------------------------------------------------------------------------|

|           |                                       |                     |      |                |                                                                                                                  |                                                                                                                                                                                                                                                                                                                                                    |                                                       |                                                                                                                                                                                                                                                                                                                                                                                                                                                                                                                                                |
|-----------|---------------------------------------|---------------------|------|----------------|------------------------------------------------------------------------------------------------------------------|----------------------------------------------------------------------------------------------------------------------------------------------------------------------------------------------------------------------------------------------------------------------------------------------------------------------------------------------------|-------------------------------------------------------|------------------------------------------------------------------------------------------------------------------------------------------------------------------------------------------------------------------------------------------------------------------------------------------------------------------------------------------------------------------------------------------------------------------------------------------------------------------------------------------------------------------------------------------------|
|           |                                       |                     |      |                |                                                                                                                  |                                                                                                                                                                                                                                                                                                                                                    |                                                       | contraceptive knowledge) outcomes <ul style="list-style-type: none"> <li>• positive attitudes toward Queer Sex Ed and high ratings for each intervention section (on average 4.2 out of 5 stars)</li> <li>• participants reported learning more in this program than in school-based sex education and appreciated the LGBT-specific approach</li> <li>• Low dislike for program, but disapproval of the limited amount of trans-specific information provided</li> </ul>                                                                      |
| QueerViBE | psychological and physical well-being | Martin <sup>b</sup> | 2019 | United Kingdom | <ul style="list-style-type: none"> <li>• MM: pilot RCT</li> <li>• online, interactive video tutorials</li> </ul> | <ul style="list-style-type: none"> <li>• 120 randomized (90 intervention, 30 waiting), 45 completed participants: intervention: 23 (13 transgender male, 10 non-binary), control: 22 (12 transgender male, 10 non-binary)</li> <li>• mean age: intervention 18.09 years (SD=1.70), control 17.73 years (SD=1.64) (range for all: 16-21)</li> </ul> | Video tutorials via YouTube (web-accessible computer) | <ul style="list-style-type: none"> <li>• significant interactions for psychological distress with medium to large effect sizes, well-being, self-esteem, positive trans identity, appraisal of stressful events, and collective self-esteem (compared to control group)</li> <li>• effective intervention for increasing self-reported empowerment and improving scores on measures of psychological, social and physical well-being compared to a waiting list control group</li> <li>• perception of general online resources for</li> </ul> |

|                                      |                                                     |                   |      |        |                                                                                                                                                  |                                                                                                                                                                                                                                                                                                |                                                                 |                                                                                                                                                                                                                                                                                                                                                                                                                                                                                                                                    |
|--------------------------------------|-----------------------------------------------------|-------------------|------|--------|--------------------------------------------------------------------------------------------------------------------------------------------------|------------------------------------------------------------------------------------------------------------------------------------------------------------------------------------------------------------------------------------------------------------------------------------------------|-----------------------------------------------------------------|------------------------------------------------------------------------------------------------------------------------------------------------------------------------------------------------------------------------------------------------------------------------------------------------------------------------------------------------------------------------------------------------------------------------------------------------------------------------------------------------------------------------------------|
|                                      |                                                     |                   |      |        |                                                                                                                                                  | <ul style="list-style-type: none"> <li>100% of total sample TGD</li> </ul>                                                                                                                                                                                                                     |                                                                 | <p>participants: limited resources, importance of community building, education to cope with stressful situations (e.g., health care encounters, educational settings)</p>                                                                                                                                                                                                                                                                                                                                                         |
| Unnamed MOOC                         | completion rate, study participants characteristics | Canavese et al.   | 2020 | Brazil | <ul style="list-style-type: none"> <li>QNT: non-randomized non-comparative pilot study</li> <li>Massive Open Online Course via Moodle</li> </ul> | <ul style="list-style-type: none"> <li>3000 participants, 582 completers (4 trans men, 7 trans women, 14 non-binary, 119 cis men, 334 cis women, 41 other, 37 not reported)</li> <li>completers mean age: 29.4 (SD = 9.9), range: 15-68 years</li> <li>11.34% of the completers TGD</li> </ul> | Massive Open Online Course via Moodle (web-accessible computer) | <ul style="list-style-type: none"> <li>mixed sample of HCPs and LGBTI+ people</li> <li>completion rate for this MOOC (about 20%) exceeds the typical average for MOOC, which stands at about 2–10%)</li> <li>63.6% (n = 370) of completers stated they had never participated in training related to health of the LGBTI+ population</li> <li>48.1% (n = 280) had never interacted with LGBTI+ social movements or NGOs in their region</li> <li>60.1% (n=350) were not aware of regional LGBTI+ health service actions</li> </ul> |
| <b>Forums and online groups</b>      |                                                     |                   |      |        |                                                                                                                                                  |                                                                                                                                                                                                                                                                                                |                                                                 |                                                                                                                                                                                                                                                                                                                                                                                                                                                                                                                                    |
| Internet: Forums and social networks | Reasons for online interactions, types of support   | Cipolletta et al. | 2017 | Italy  | <ul style="list-style-type: none"> <li>QUAL: NIS</li> <li>Forums and social networks</li> </ul>                                                  | <ul style="list-style-type: none"> <li>analysis of 122 online community conversations (Italian forums and Facebook groups involving trans people), among them 39 forum users (14 MtF; 8 FtM; 5 non-transgender</li> </ul>                                                                      | Forums, Facebook (web-accessible computer)                      | <ul style="list-style-type: none"> <li>3 forums found: one for trans people only; one for LGBT; one contained a thread on transgenderism, which was moderated by a female psychologist</li> <li>5 Facebook groups found: 4 for trans people and 1 for LGBT</li> </ul>                                                                                                                                                                                                                                                              |

|                                                                                                                                                                                                                                                                                                                                                                                                   |                                                                                                                                                                                                                                                                                                                                                                                                                                                                                                                                                                                                                                                                                                                                                                                                           |
|---------------------------------------------------------------------------------------------------------------------------------------------------------------------------------------------------------------------------------------------------------------------------------------------------------------------------------------------------------------------------------------------------|-----------------------------------------------------------------------------------------------------------------------------------------------------------------------------------------------------------------------------------------------------------------------------------------------------------------------------------------------------------------------------------------------------------------------------------------------------------------------------------------------------------------------------------------------------------------------------------------------------------------------------------------------------------------------------------------------------------------------------------------------------------------------------------------------------------|
| <p>male; 2 non-transgender female; 10 non-identified gender, among them 4 admins, 3 moderators, 1 psychologist)</p> <ul style="list-style-type: none"> <li>• online interviews with 16 users of these communities (9 MtF, 4 FtM, 1 non-identified gender, 1 male, 1 female)</li> <li>• age of interviewees: mean = 44 years, range = 25-64 years</li> <li>• 63.64% of total sample TGD</li> </ul> | <ul style="list-style-type: none"> <li>• total number of selected conversations: 122 (about 2440 answers and 107,935 words), comprising 46 conversations on forums and 76 conversations on Facebook groups</li> <li>• six final categories were identified after analysis of online communities and of interviews: motivations, online help, differences between online and offline interactions, status, conflicts and professional help</li> <li>• Findings on professional help: in case of specific medical requests tips for searching for help offline provided (e.g., list of professional names or LGBT organizations)</li> <li>• study participants find it positive when doctors, psychologists, lawyers offer help in online communities to manage user flow and shared information</li> </ul> |
|---------------------------------------------------------------------------------------------------------------------------------------------------------------------------------------------------------------------------------------------------------------------------------------------------------------------------------------------------------------------------------------------------|-----------------------------------------------------------------------------------------------------------------------------------------------------------------------------------------------------------------------------------------------------------------------------------------------------------------------------------------------------------------------------------------------------------------------------------------------------------------------------------------------------------------------------------------------------------------------------------------------------------------------------------------------------------------------------------------------------------------------------------------------------------------------------------------------------------|

Abbreviations: AFAB = assigned female sex at birth, AMAB = assigned male sex at birth, CBT = cognitive behavioral therapy, FtM = female to male, HCPs = health care professionals, LGBTQIA+ = lesbian, gay, bisexual, transgender, queer, intersex, asexual, + stands for the inclusive representation of all identities and expressions, MM = mixed methods study, MOOC = massive open online course, MSM = men who have sex with men, MtF = male to female, NIS = non-interventional study, QNT = quantitative study, QUAL = qualitative study, TGD = transgender and gender diverse

<sup>a</sup> additional sources identified via associated published studies to the study protocols (see Supplementary File S1, Figure S1, Supplementary Material)

<sup>b</sup> additional articles sourced from reference lists (see Supplementary File S1, Figure S1, Supplementary Material)

Table S2. Systematic review summary of included studies with health care professionals-only samples.

| Intervention name                              | Outcomes                                                        | Author(s)       | Year | Location | Study design, Data collection                                                                                                                                        | Description of sample, <i>n</i>                                                                                                              | Digital platform                                    | Findings                                                                                                                                                                                                                                                                                                                                                                                                                                                                                                                                                                                                                                                     |
|------------------------------------------------|-----------------------------------------------------------------|-----------------|------|----------|----------------------------------------------------------------------------------------------------------------------------------------------------------------------|----------------------------------------------------------------------------------------------------------------------------------------------|-----------------------------------------------------|--------------------------------------------------------------------------------------------------------------------------------------------------------------------------------------------------------------------------------------------------------------------------------------------------------------------------------------------------------------------------------------------------------------------------------------------------------------------------------------------------------------------------------------------------------------------------------------------------------------------------------------------------------------|
| <b>Teleconsultations or e-consultations</b>    |                                                                 |                 |      |          |                                                                                                                                                                      |                                                                                                                                              |                                                     |                                                                                                                                                                                                                                                                                                                                                                                                                                                                                                                                                                                                                                                              |
| VHA Transgender SCAN-ECHO / VHA e-consultation | confidence in providing care to trans veterans                  | Kauth et al.    | 2015 | USA      | <ul style="list-style-type: none"> <li>QNT: non-comparative pilot study (3-year feasibility program)</li> <li>teleconsultation and training to clinicians</li> </ul> | <ul style="list-style-type: none"> <li>33 participants (5 learning teams; 13 participants completed evaluation)</li> <li>age: n/a</li> </ul> | VHA teleconsultation technology (videoconferencing) | <ul style="list-style-type: none"> <li>degree of confidence (0–100%) in providing care to trans veterans before and after participating in SCAN-ECHO: 39.7% increase</li> <li>92.3% described didactics as “somewhat helpful” or “very helpful”</li> <li>76.9% reported that receiving consultation was “somewhat helpful” or “very helpful”</li> <li>92.3% felt they benefited from listening to other cases being discussed</li> <li>76.9% found resources on the internal Web site “somewhat helpful” or “very helpful”</li> <li>92.3% reported that knowing experts they could contact in the future was “somewhat helpful” or “very helpful”</li> </ul> |
|                                                | feasibility, typical questions from providers in e-consultation | Shipherd et al. | 2016 | USA      | <ul style="list-style-type: none"> <li>QNT: non-comparative pilot study (3-year feasibility program)</li> <li>e-consultation</li> </ul>                              | <ul style="list-style-type: none"> <li>303 e-consults from 130 facilities (submitted by providers at VA)</li> </ul>                          | VHA teleconsultation technology (videoconferencing) | <ul style="list-style-type: none"> <li>primary questions about medications, e.g., hormone therapy (n=125), primary care medical comorbidity and screening</li> </ul>                                                                                                                                                                                                                                                                                                                                                                                                                                                                                         |

|                                                                                                |                 |      |     |                                                                                                                              |                                                                                                                                                                                                                           |                                                     |                                                                                                                                                                                                                                                                                                                                                                                                                                                                                                                                                                                   |
|------------------------------------------------------------------------------------------------|-----------------|------|-----|------------------------------------------------------------------------------------------------------------------------------|---------------------------------------------------------------------------------------------------------------------------------------------------------------------------------------------------------------------------|-----------------------------------------------------|-----------------------------------------------------------------------------------------------------------------------------------------------------------------------------------------------------------------------------------------------------------------------------------------------------------------------------------------------------------------------------------------------------------------------------------------------------------------------------------------------------------------------------------------------------------------------------------|
|                                                                                                |                 |      |     |                                                                                                                              | <ul style="list-style-type: none"><li>hospitals, n = 177, 58%, and the rest, n = 126, 41%, were from community-based outpatient clinics)</li><li>age: n/a</li></ul>                                                       |                                                     | <ul style="list-style-type: none"><li>questions (n=97), mental health evaluations for hormone therapy and/or gender confirming surgeries (n=63), and questions about psychotherapy (n=18)</li><li>secondary questions about mental health issues (n=31), medications (n=22), primary care (n=14), and psychotherapy (n=12)</li><li>average amount of time spent on reviewing the chart and responding to the consult question: 78 min (63–94 min) total per consult</li><li>each profession took an average of about 34 min (range = 18–58) to respond to the e-consult</li></ul> |
| providers' program experiences (qualitative), methods for improving program use (quantitative) | Blosnich et al. | 2019 | USA | <ul style="list-style-type: none"><li>MM: non-randomized study (3-year feasibility program)</li><li>e-consultation</li></ul> | <ul style="list-style-type: none"><li>15 interview participants (11 rural, 4 urban; 12 primary care, 3 mental health)</li><li>53 survey participants (18 rural, 35 urban; several disciplines)</li><li>age: n/a</li></ul> | VHA teleconsultation technology (videoconferencing) | <ul style="list-style-type: none"><li>common reasons for nonuse of program: no knowledge of program (54%), no need of program (32%), receipt of help from a colleague outside of e-consult (24%)</li><li>common suggestions to improve the program use: more information about where to find e-consult in the chart,</li></ul>                                                                                                                                                                                                                                                    |



|                                                                                                                       |                                                |                      |      |     |                                                                                                                            |                                                                                                                                                                                          |                                   |                                                                                                                                                                                                                                                                          |                                                                                                                                                                                                                                                                                                                                                                                                                                                                                                                                                                                                                                  |
|-----------------------------------------------------------------------------------------------------------------------|------------------------------------------------|----------------------|------|-----|----------------------------------------------------------------------------------------------------------------------------|------------------------------------------------------------------------------------------------------------------------------------------------------------------------------------------|-----------------------------------|--------------------------------------------------------------------------------------------------------------------------------------------------------------------------------------------------------------------------------------------------------------------------|----------------------------------------------------------------------------------------------------------------------------------------------------------------------------------------------------------------------------------------------------------------------------------------------------------------------------------------------------------------------------------------------------------------------------------------------------------------------------------------------------------------------------------------------------------------------------------------------------------------------------------|
|                                                                                                                       |                                                |                      |      |     |                                                                                                                            |                                                                                                                                                                                          |                                   |                                                                                                                                                                                                                                                                          | <div>guidance on talking with patients about program, e-mail announcements to improve provider awareness of the program</div> <div><ul style="list-style-type: none"><li>• program used to establish care plans, hormone therapy recommendations, sexual and reproductive health education, surgical treatment education, patient-provider communication guidance, and second opinions</li><li>• suggestions for improvement: addition of concise or sectioned responses, expansion of program awareness, designation of a follow-up contact person, and increase in provider education about trans-related care</li></ul></div> |
| Online trainings or courses                                                                                           |                                                |                      |      |     |                                                                                                                            |                                                                                                                                                                                          |                                   |                                                                                                                                                                                                                                                                          |                                                                                                                                                                                                                                                                                                                                                                                                                                                                                                                                                                                                                                  |
| Addressing the Needs for LGBTQ-Affirming Cancer Care: A Focus on Sexual and Gender Minority Prostate Cancer Survivors | knowledge increase, satisfaction with training | Pratt-Chapman et al. | 2020 | USA | <div><ul style="list-style-type: none"><li>• QNT: non-randomized non-comparative</li><li>• Online training</li></ul></div> | <div><ul style="list-style-type: none"><li>• 204 participants (archived training, of which 77 participated in the webinar)</li><li>• Archived training: age group 21-29,</li></ul></div> | Webinar (web-accessible computer) | <div><ul style="list-style-type: none"><li>• Knowledge increase about interpersonal determinants that lead to LGBTQI health inequities (live webinar): strongly agree (71, 91.2%)</li><li>• Knowledge increase about unique needs of GBT prostate cancer</li></ul></div> |                                                                                                                                                                                                                                                                                                                                                                                                                                                                                                                                                                                                                                  |

|                                             |                                                                   |                |      |     |                                                                                                                                                        |                                                                                                                                                                                  |                                            |                                                                                                                                                                                                                                                                                                                                                                                                                                                                                                                           |
|---------------------------------------------|-------------------------------------------------------------------|----------------|------|-----|--------------------------------------------------------------------------------------------------------------------------------------------------------|----------------------------------------------------------------------------------------------------------------------------------------------------------------------------------|--------------------------------------------|---------------------------------------------------------------------------------------------------------------------------------------------------------------------------------------------------------------------------------------------------------------------------------------------------------------------------------------------------------------------------------------------------------------------------------------------------------------------------------------------------------------------------|
|                                             |                                                                   |                |      |     |                                                                                                                                                        | <p>n=45 (22.1%); 30-39, n=68 (33.3%); 40-49, n=40 (19.6%); 50-59 n=34 (16.7%); 60 or older, n=13 (6.4%); prefer not to answer, n=4 (2.0%); webinar: no data collected on age</p> |                                            | <p>patients: strongly agree (72, 94.8%)</p> <ul style="list-style-type: none"> <li>Knowledge increase about affirming and culturally sensitive strategies: strongly agree (73, 94.8%)</li> <li>Examples perceived as practical: strongly agree (73, 96.1%)</li> <li>Gained new strategies and resources for work: strongly agree (69, 90.8%)</li> <li>Plans for implement of new strategies and resources for work: strongly agree (63, 84.0%)</li> <li>Recommendation of training: strongly agree (75, 97.4%)</li> </ul> |
| COLORS training                             | LGBT-related knowledge, attitudes, clinical practices             | Seay et al.    | 2020 | USA | <ul style="list-style-type: none"> <li>QNT: non-randomized non-comparative pilot study</li> <li>web-based LGBT cultural competency training</li> </ul> | <ul style="list-style-type: none"> <li>44 participants (oncologists), 33 (75%) completed the COLORS training</li> <li>mean age: 47.4 years (SD = 9.3)</li> </ul>                 | Training website (web-accessible computer) | <ul style="list-style-type: none"> <li>after completing the training: ↑ LGBT-related knowledge, ↑ attitudes, ↑ clinical practices</li> <li>↑ training acceptability: 82% of participants rating the training as high quality, and 97% being willing to recommend the training to a colleague</li> </ul>                                                                                                                                                                                                                   |
| Unnamed interactive online didactic session | clinical skills, clinical preparedness, knowledge on LGBTQ health | Barrett et al. | 2021 | USA | <ul style="list-style-type: none"> <li>QNT: non-randomized non-comparative</li> <li>interactive online didactic session</li> </ul>                     | <ul style="list-style-type: none"> <li>29 participants (residents, medical students): 12 male (41%), 15 female</li> </ul>                                                        | Videoconferencing (n.n.ref.)               | <ul style="list-style-type: none"> <li>29 attendees completed the baseline survey (15 residents and 14 medical students)</li> <li>18 completed the follow-up survey (8</li> </ul>                                                                                                                                                                                                                                                                                                                                         |

|                                |                                                                                 |              |      |        |                                                                                                                       |                                                                                                                                                                                 |                                                          |                                                                                                                                                                                                                                                                                                                                                                                                                                                                                     |
|--------------------------------|---------------------------------------------------------------------------------|--------------|------|--------|-----------------------------------------------------------------------------------------------------------------------|---------------------------------------------------------------------------------------------------------------------------------------------------------------------------------|----------------------------------------------------------|-------------------------------------------------------------------------------------------------------------------------------------------------------------------------------------------------------------------------------------------------------------------------------------------------------------------------------------------------------------------------------------------------------------------------------------------------------------------------------------|
|                                |                                                                                 |              |      |        |                                                                                                                       | (52%), 2 other/missing (7%), among them 6 LGBT-identified (21%)                                                                                                                 |                                                          | residents and 10 medical students)                                                                                                                                                                                                                                                                                                                                                                                                                                                  |
|                                |                                                                                 |              |      |        |                                                                                                                       | <ul style="list-style-type: none"> <li>mean age: 29 (SD = 5)</li> </ul>                                                                                                         |                                                          | <ul style="list-style-type: none"> <li>baseline and follow-up scores from the clinical skills scale increased overall, in self-reported clinical preparedness, and in basic knowledge</li> </ul>                                                                                                                                                                                                                                                                                    |
| Unnamed web-based intervention | effectiveness of intervention program, prejudices, prevalence of discrimination | Costa et al. | 2016 | Brazil | <ul style="list-style-type: none"> <li>QNT: non-randomized non-comparative</li> <li>web-based intervention</li> </ul> | <ul style="list-style-type: none"> <li>307 health practitioners (259 women, 84.36%; 48 men, 15.63%)</li> <li>average age: 34.52 years (SD = 9.40), range 18-62 years</li> </ul> | University e-learning platform (web-accessible computer) | <ul style="list-style-type: none"> <li>↑ pre-intervention prejudice level of HCPS (higher among those with less education, inhabiting smaller cities, with no previous education in the subject and religiosity)</li> <li>68.74% were not aware of episodes of discrimination in their health services</li> <li>intervention was effective: percentage of participants in the lowest category of prejudice rose by 55.73 percent after the intervention (11.07%– 19.87%)</li> </ul> |

Abbreviations: HCPs = health care professionals, LGBTQIA+ = lesbian, gay, bisexual, transgender, queer, intersex, asexual, + stands for the inclusive representation of all identities and expressions, MM = mixed methods study, QNT = quantitative study, QUAL = qualitative study, VHA = Veterans Health Administration
