# Supplementary material for: Need for Inclusive Consideration of Transgender and Gender Diverse People in E-Health Services: A Systematic Review
Source: J Clin Med. 2022 Feb 18;11(4):1090. doi: 10.3390/jcm11041090 (PMC8880545; doi:10.3390/jcm11041090)
Supplement: Supplementary file 1 [file jcm-11-01090-s001.zip]

Archive with 5 entries (5 files):
- Supplementary File S1_PRISMA_2020_flow_diagram_new_SRs_v2_Review_Trans.pdf
- Supplementary File S2_Tables_Systematic_Review_Findings.pdf
- Supplementary File S3_Search_Strategy.pdf
- Supplementary File S4_Critical_Appraisal.pdf
- Supplementary File S5_PRISMA_2020_checklist.pdf
